# Supplementary material for: Motor planning brings human primary somatosensory cortex into action-specific preparatory states
Source: eLife journal article supplement (doi:10.7554/elife.69517), 2022-01-12
Supplement: supp [file elife-69517-supp-v1.zip]

Archive with 3 entries (3 files):
- elife_poa_e69517_Transparent_Reporting_File.pdf
- elife_poa_e69517_Figure_2_figure_supplement_1.pdf
- elife_poa_e69517_Figure_2_figure_supplement_2.pdf
