# Supplementary material for: Motor planning brings human primary somatosensory cortex into action-specific preparatory states
Source: eLife journal article supplement (doi:10.7554/elife.69517), 2022-01-12

Univariate activation  
(percent signal change)

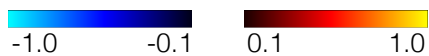

**A**

Planning

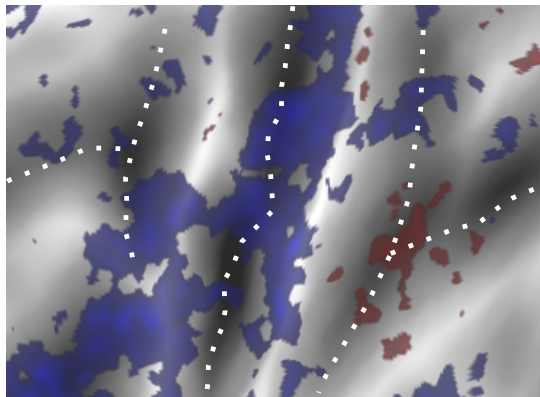

Multivariate distance  
(arbitrary units)

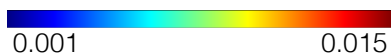

**B**

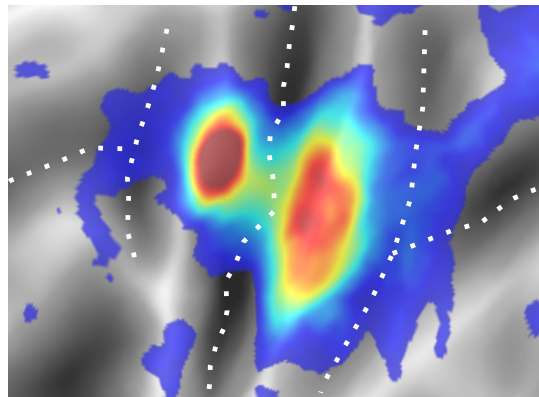

**C**

Execution

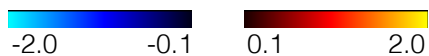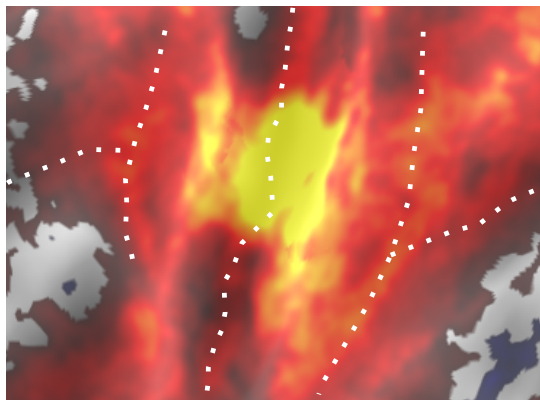

**D**

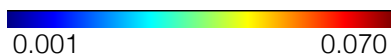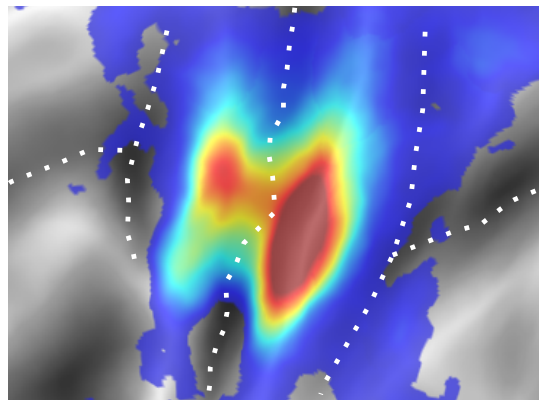

**E**

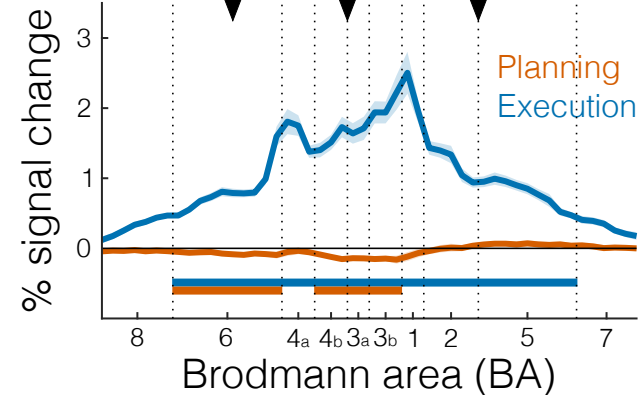

**F**

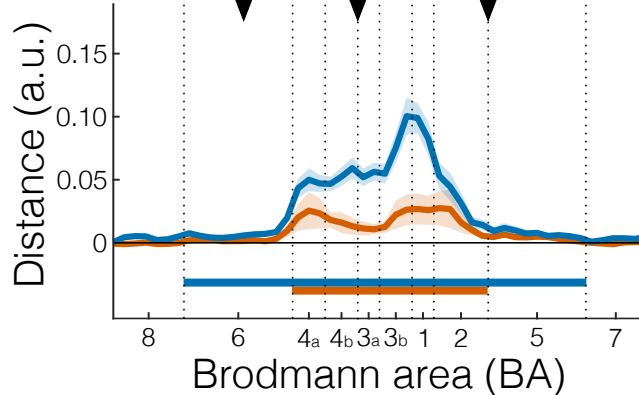

Supplement: supp [file elife-69517-supp-v1.zip › elife_poa_e69517_Figure_2_figure_supplement_1.pdf]
