# Supplementary material for: Motor planning brings human primary somatosensory cortex into action-specific preparatory states
Source: eLife journal article supplement (doi:10.7554/elife.69517), 2022-01-12

**A**Univariate activation  
(percent signal change)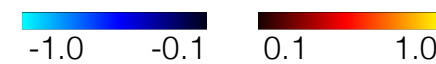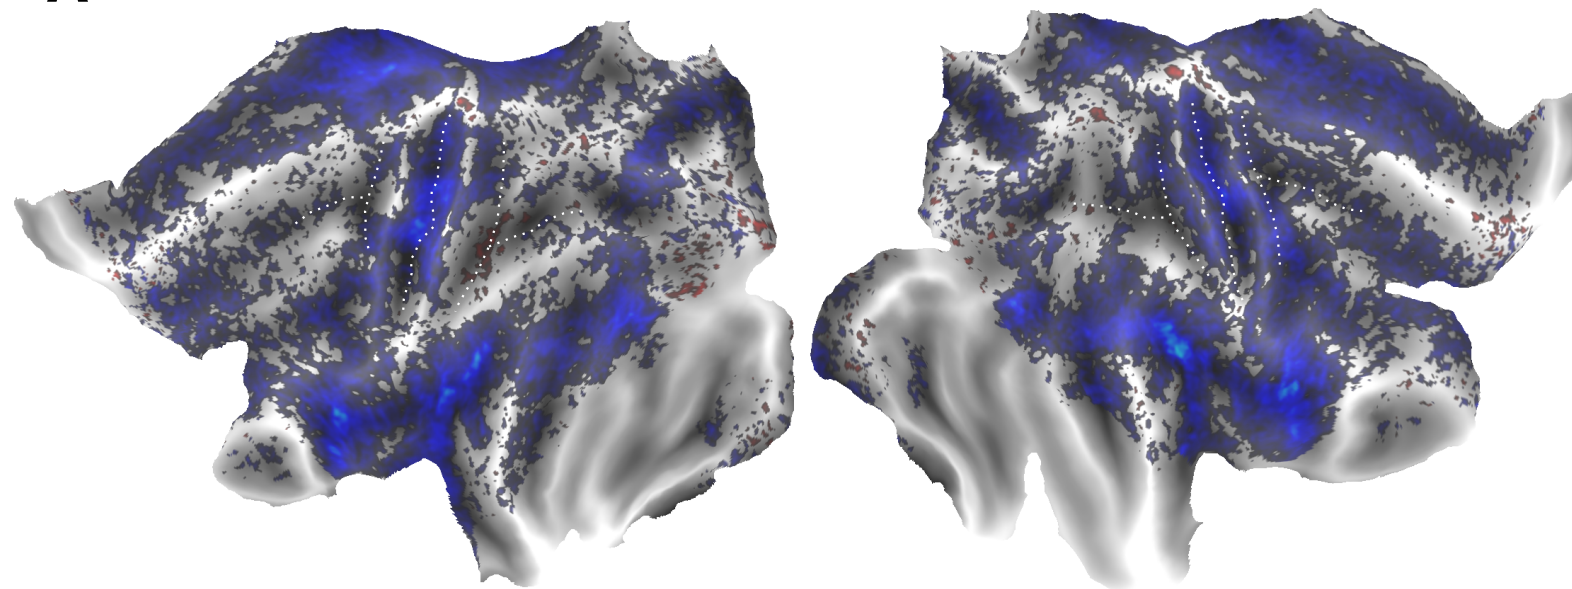**B**Multivariate distance  
(arbitrary units)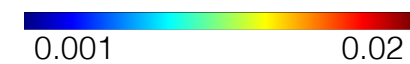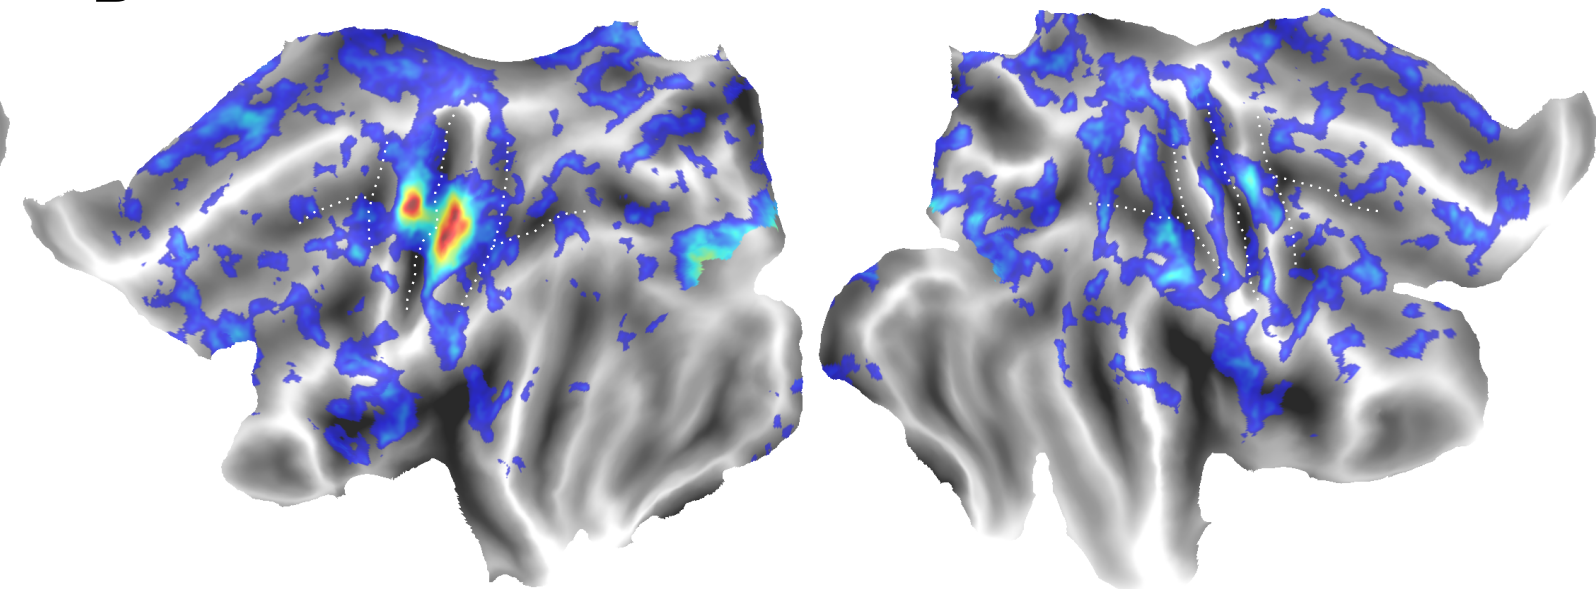**C**Univariate activation  
(percent signal change)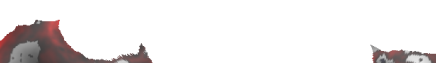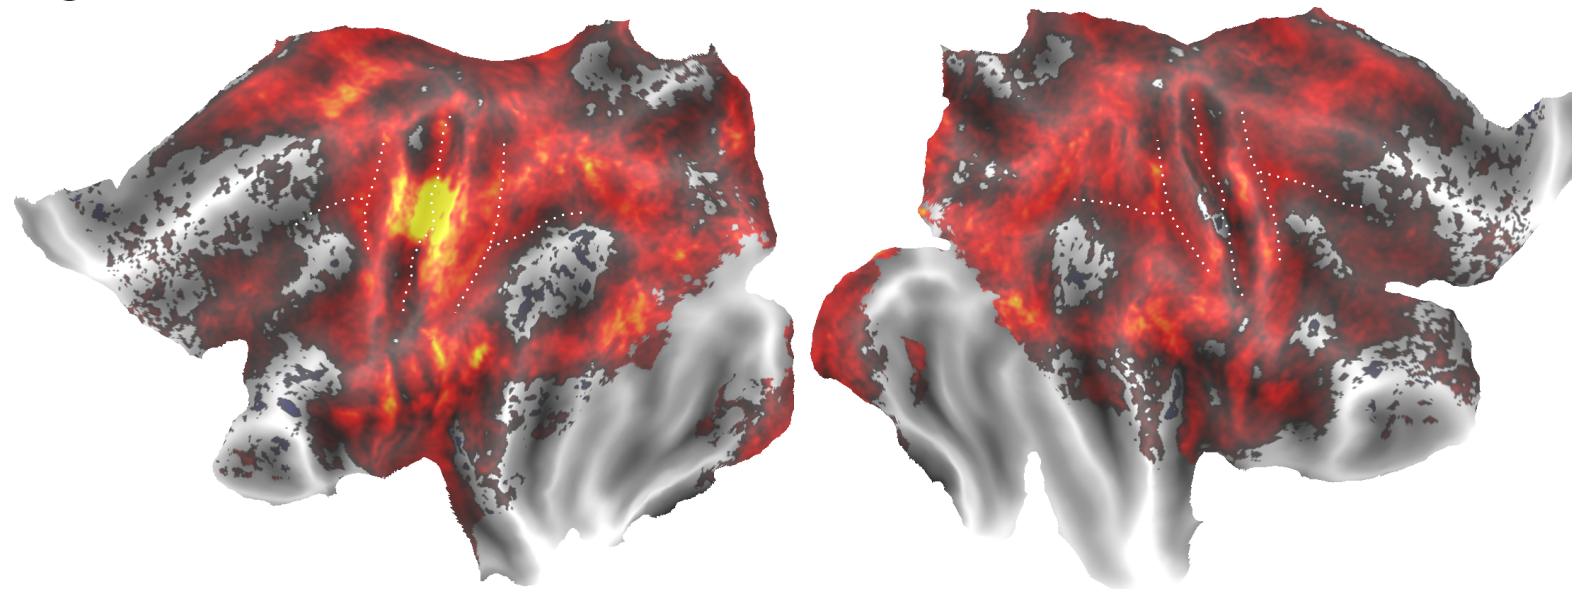**D**Multivariate distance  
(arbitrary units)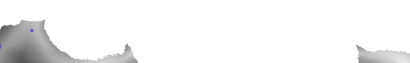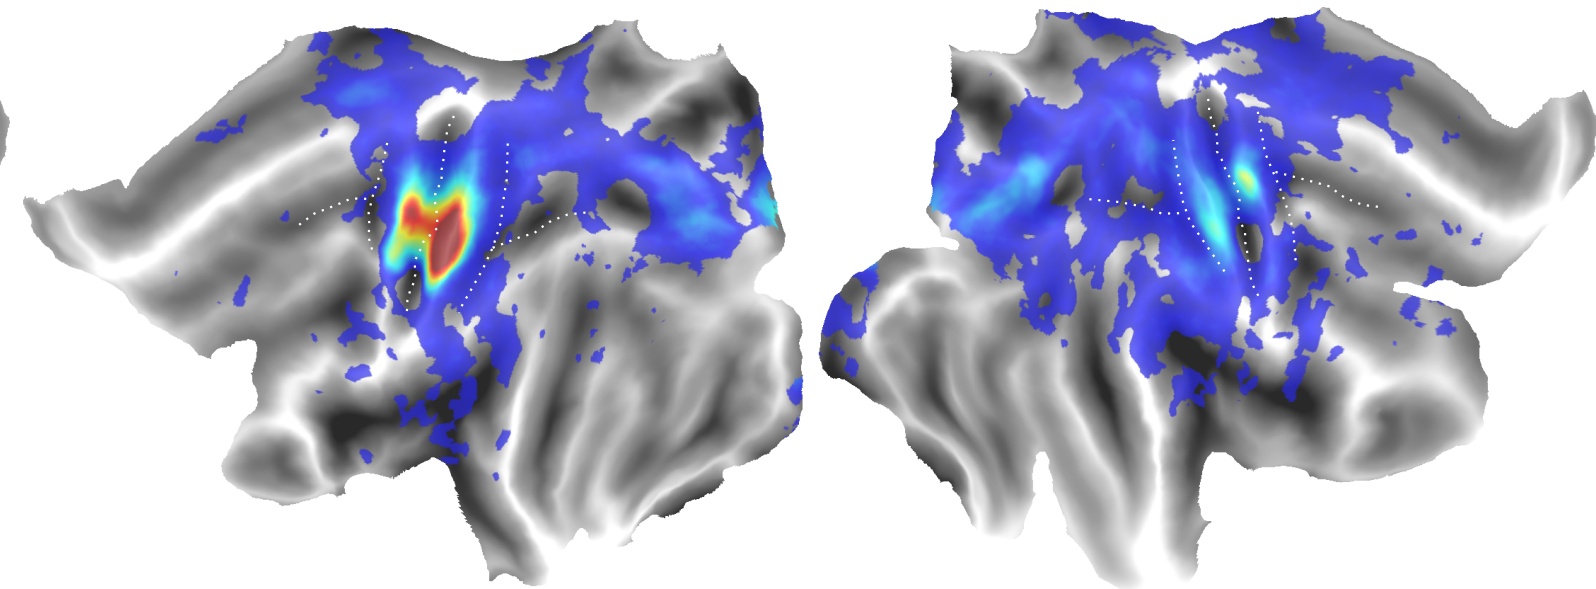

Supplement: supp [file elife-69517-supp-v1.zip › elife_poa_e69517_Figure_2_figure_supplement_2.pdf]
